# Supplementary material for: A multifunctional oriented nanocrystalline Pb0.91La0.06Zr0.8Ti0.2O3 relaxor ferroelectric thin film for chip power and thermal management
Source: Royal Society of Chemistry journal article supplement (doi:10.1039/d4tc01210k), 2024-01-01
Supplement: d4tc01210k1.pdf [file d4tc01210k1.pdf]

**Multifunctional oriented nanocrystalline  $\text{Pb}_{0.91}\text{La}_{0.06}\text{Zr}_{0.8}\text{Ti}_{0.2}\text{O}_3$  relaxor  
ferroelectric thin film for chip power and thermal management**

Yuxuan Hou<sup>a</sup>, Junjie Li<sup>b</sup>, Ruowei Yin<sup>a</sup>, Xiaopo Su<sup>a</sup>, Yanjing Su<sup>a</sup>, Lijie Qiao<sup>a</sup>,  
Chuanbao Liu<sup>a</sup>, Qian Li<sup>c</sup> and Yang Bai<sup>a,\*</sup>

<sup>a</sup> Beijing Advanced Innovation Center for Materials Genome Engineering, Institute  
for Advanced Materials and Technology, University of Science and Technology  
Beijing, Beijing 100083, China

<sup>b</sup> Sichuan Province Key Laboratory of Information Materials and Devices Application,  
College of Optoelectronic Engineering, Chengdu University of Information  
Technology, Chengdu 610225, China

<sup>c</sup> State Key Laboratory of New Ceramics and Fine Processing, School of Materials  
Science and Engineering, Tsinghua University, Beijing 100084, China

\*Author to whom correspondence should be addressed.

Prof. Y. Bai, Email: baiy@mater.ustb.edu.cn

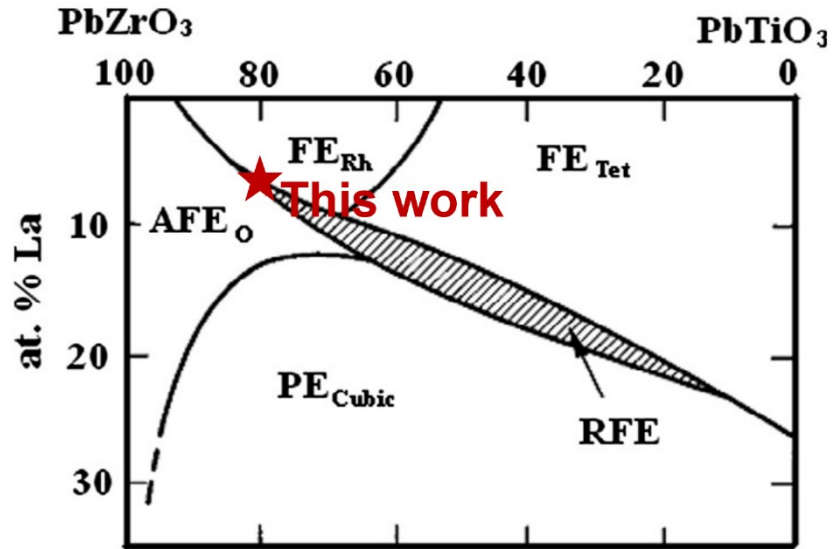

**Fig. S1.** The phase diagram of  $(\text{PbLa})(\text{Zr,Ti})\text{O}_3$  system; the investigated composition in this work is located on the red star.

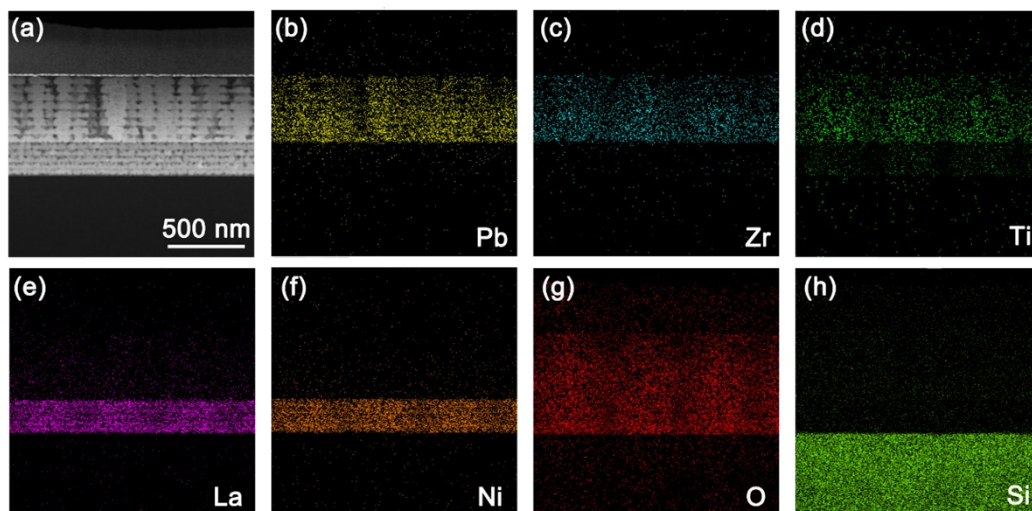

**Fig. S2.** (a) HAADF-STEM image and (b-h) elemental distribution mapping of the PLZT/LNO/Si thin film.

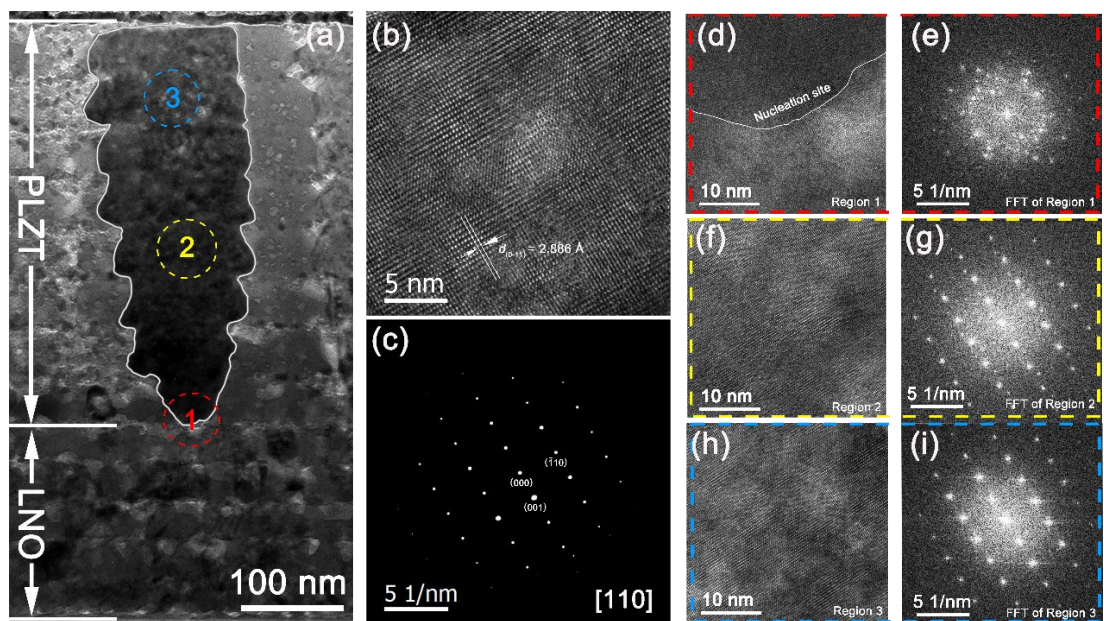

**Fig. S3.** (110)-oriented grain structure of the PLZT 6/80/20 thin film. (a) [110] direction grain morphology (inside the white solid line); (b) HRTEM atomic image and (c) SAED patterns of the grain viewing from the [110] direction; (d-i) separately show the morphology and corresponding FFT images of region 1, 2 and 3 inside the grain of (a).

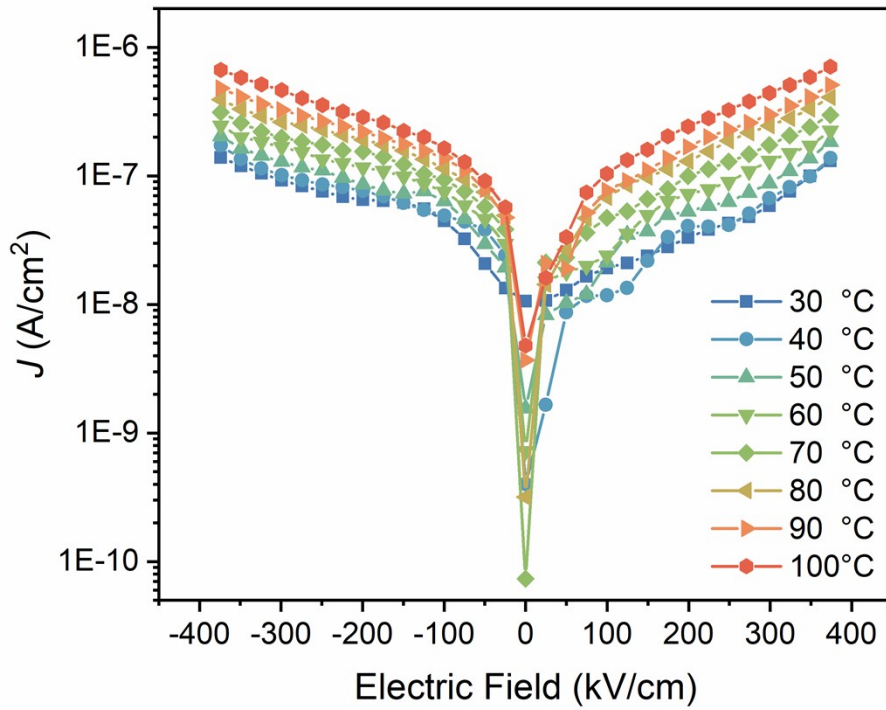

**Fig. S4.** The leakage current density-electric field ( $J$ - $E$ ) plots of the PLZT 6/80/20 film measured under different temperatures

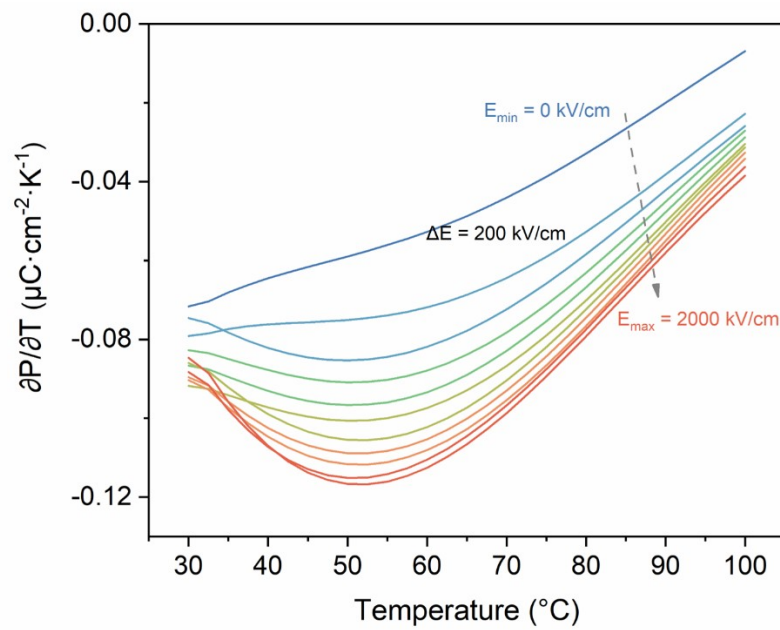

**Fig. S5.**  $\partial P/\partial T$  obtained from six-order polynomial fitting of raw  $P$ - $T$  data

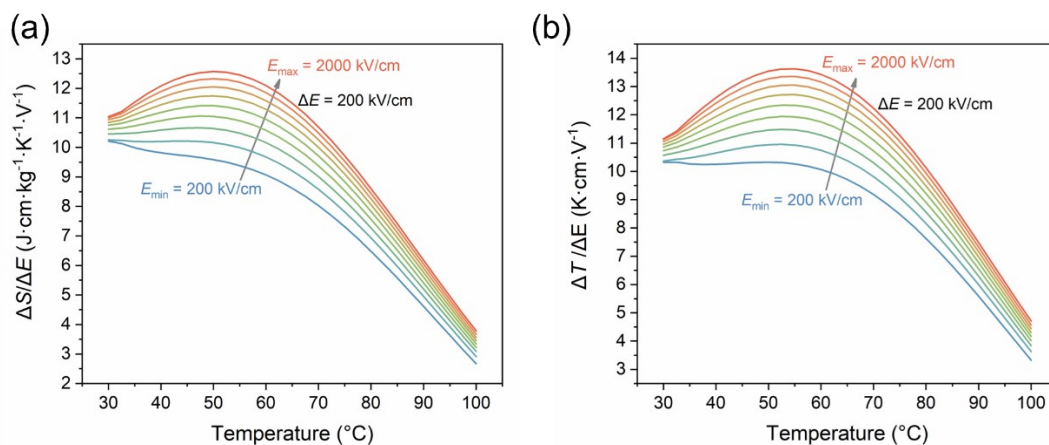

**Fig. S6.** Electrocaloric strength of the PLZT 6/80/20 thin film. (a) isothermal entropy change strength and (b) adiabatic temperature change strength.

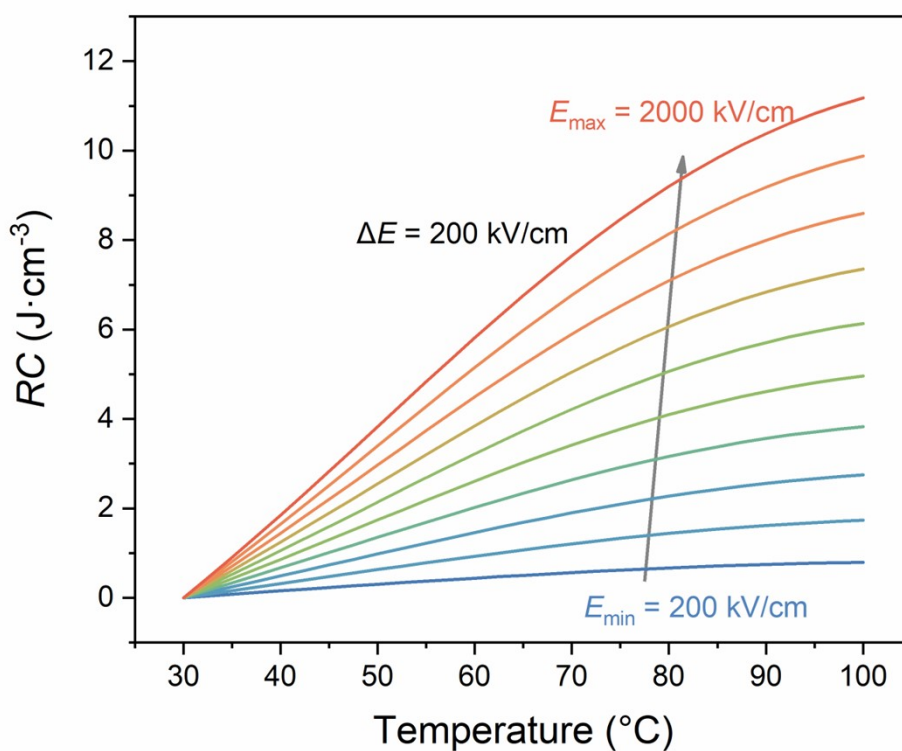

**Fig. S7.** Refrigerant capacity of the PLZT 6/80/20 thin film at different electric field.

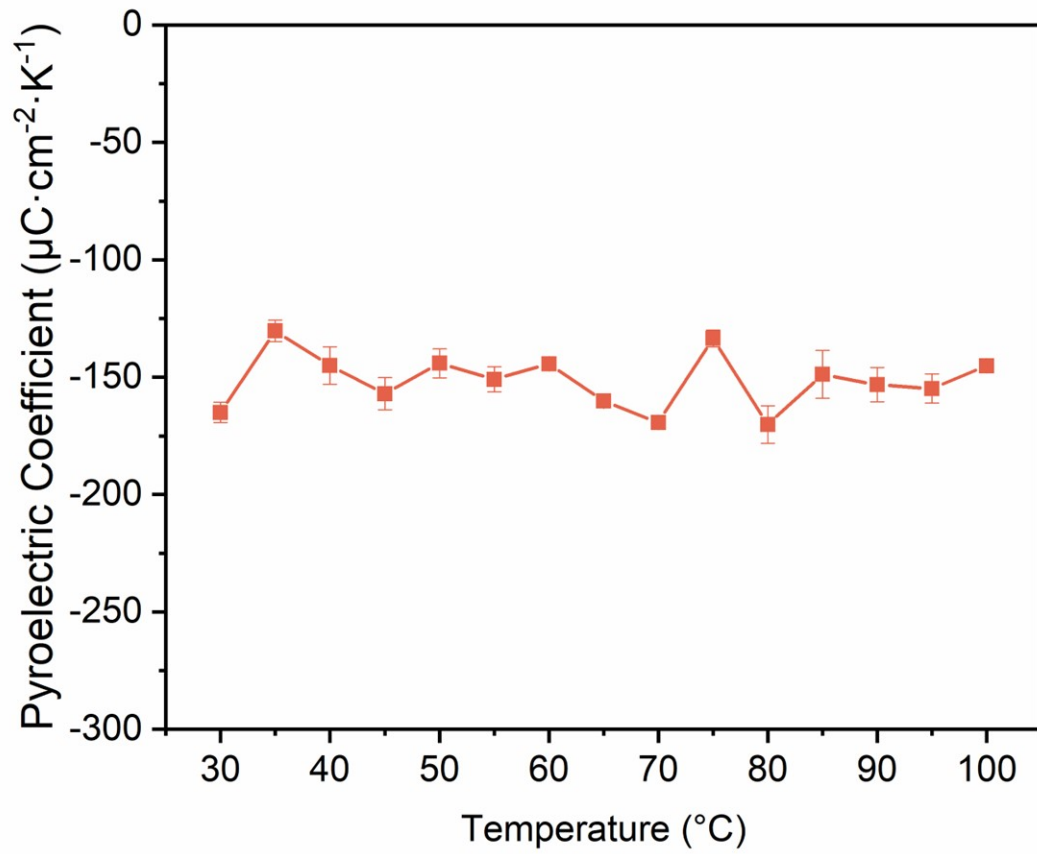

**Fig. S8.** The pyroelectric coefficient of the PLZT 6/80/20 thin film within the temperature range of 30 ~ 100 °C.
